# Supplementary material for: Characterization of the Contradictory Chromatin Signatures at the 3′ Exons of Zinc Finger Genes
Source: PLOS journal article supplement (doi:10.1371/journal.pone.0017121), 2011-02-15

Figure S2

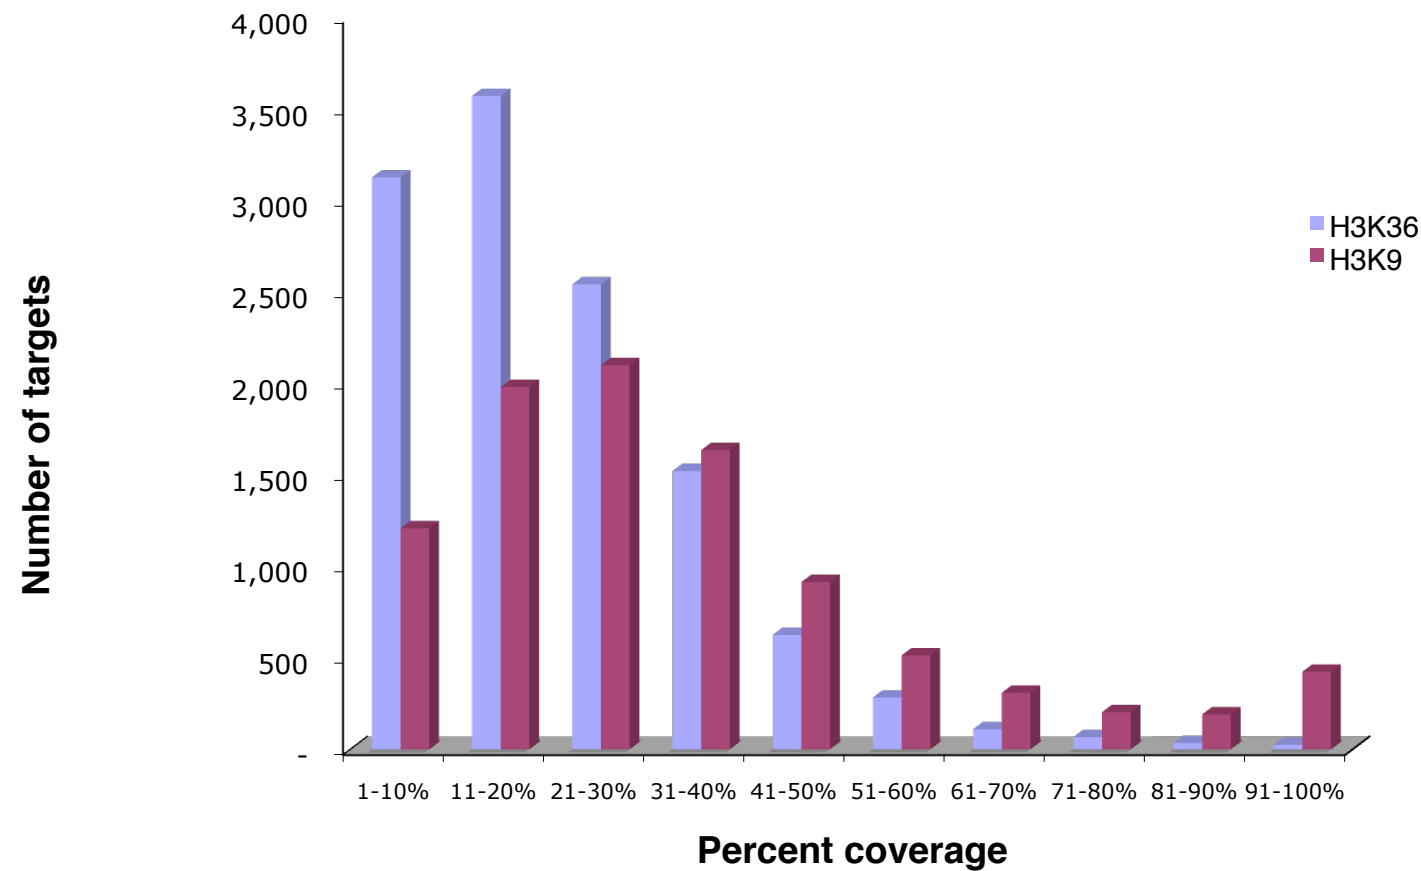

Supplement: S3 (10.1371/journal.pone.0017121.s003) [file journal.pone.0017121.s003]
